# Supplementary material for: Bimetallic phosphide NixCo1−xP decorated flower-like ZnIn2S4 for enhanced photocatalytic hydrogen evolution
Source: Royal Society of Chemistry journal article supplement (doi:10.1039/d1nj02019f), 2021-01-01
Supplement: d1nj02019f1.pdf [file d1nj02019f1.pdf]

## Supplementary information

### **Bimetallic phosphide $\text{Ni}_x\text{Co}_{1-x}\text{P}$ decorated flower-like $\text{ZnIn}_2\text{S}_4$ for enhanced photocatalytic hydrogen evolution**

Yumeng Wang, Tingting Zhang, Tingting Wei, Fengyan Li\*, Lin Xu\*

Key Laboratory of Polyoxometalate and Reticular Material Chemistry of Ministry of Education,  
College of Chemistry, Northeast Normal University, Changchun 130024, P. R. China.

## Materials

All reagents were of analytical grade without further purification, including Zinc chloride ( $\text{ZnCl}_2$ ), Indium(III) chloride tetrahydrate ( $\text{InCl}_3 \cdot 4\text{H}_2\text{O}$ , 99%), thioacetamide ( $\text{CH}_3\text{CSNH}_2$ , TAA), Cobalt nitrate hexahydrate ( $\text{Co}(\text{NO}_3)_2 \cdot 6\text{H}_2\text{O}$ ) from Aladdin, Glycerol, hydrochloric acid (HCl, 36%), sodium hypophosphite monohydrate ( $\text{NaH}_2\text{PO}_2 \cdot 2\text{H}_2\text{O}$ ,  $\geq 98.0\%$ ), nickel nitrate hexahydrate ( $\text{Ni}(\text{NO}_3)_2 \cdot 6\text{H}_2\text{O}$ ) were achieved through Sinopharm Chemical Reagent Co., Ltd. Deionized (DI) water was used during the whole experiment process.

## Characterization

The obtained products were characterized by X-ray diffraction (XRD, Rigaku Smartlab SE, Japan) and XRD patterns were obtained at  $10^\circ$ – $80^\circ$  at a scanning rate of  $10^\circ \text{ min}^{-1}$ . A scanning electron microscope (Hitachi SU-8000 FE-SEM) was used to characterize the morphology and size of the powder samples. Transmission electron microscopy (TEM, JEM 2100-F) operated at an accelerating voltage of 200 kV. The X-ray photoelectron spectroscopy was used to analyze the chemical states of the synthetic products using a USWHA150 photoelectron spectrometer with a monochromatic Al  $K\alpha$  excitation source, and the binding energies of all elements are calibrated by C 1s at 284.8 eV. Ultraviolet–visible diffuse reflectance spectra (DRS) was measured with a UV-vis spectrophotometer (Varian Cary 500) in the range 200–800 nm. Photoluminescence (PL) measurements were carried out on an F-7000 fluorescence spectrophotometer at room temperature.

## Photoelectrochemical testing

The Nyquist plots, photocurrent measurements and Mott-Schottky (MS) Measurements were all recorded by a CHI660E electrochemical workstation (Shanghai Chenhua Instrument Co. Ltd.) in a 0.5 M aqueous  $\text{Na}_2\text{SO}_4$  solution electrolyte, using a standard three-electrode system, where a saturated calomel electrode (SCE) and a platinum wire electrode were used as the reference and counter electrodes, respectively. The working electrode utilized samples wrapped F-doped tin oxide (FTO) glasses.

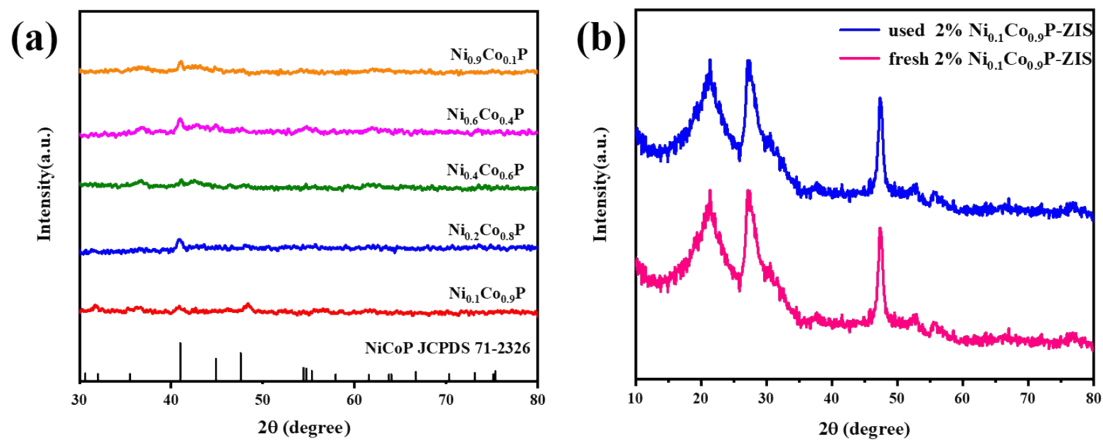

**Fig. S1** XRD patterns of (a)  $\text{Ni}_x\text{Co}_{1-x}\text{P}$  (b) the fresh and used  $\text{Ni}_{0.1}\text{Co}_{0.9}\text{P}$ -ZIS.

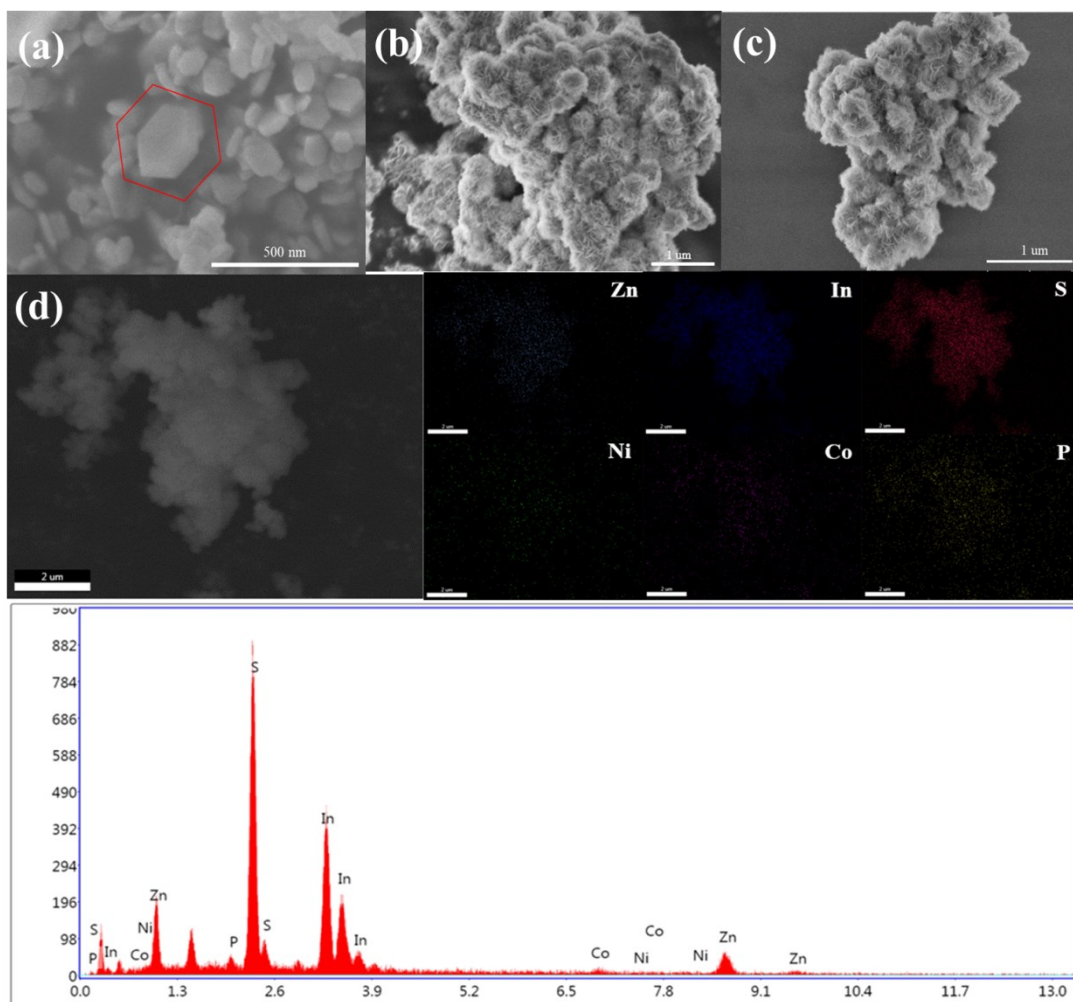

**Fig. S2** SEM image of  $\text{Ni}_{0.1}\text{Co}_{0.9}\text{P}$ (a), fresh  $2\%\text{Ni}_{0.1}\text{Co}_{0.9}\text{P-ZIS}$ (b), used  $2\%\text{Ni}_{0.1}\text{Co}_{0.9}\text{P-ZIS}$  (c), HAADF-STEM of  $2\%\text{Ni}_{0.1}\text{Co}_{0.9}\text{P-ZIS}$ (d), Energy-dispersive X-ray (EDX) spectrum of  $2\%\text{Ni}_{0.1}\text{Co}_{0.9}\text{P-ZIS}$ (e).

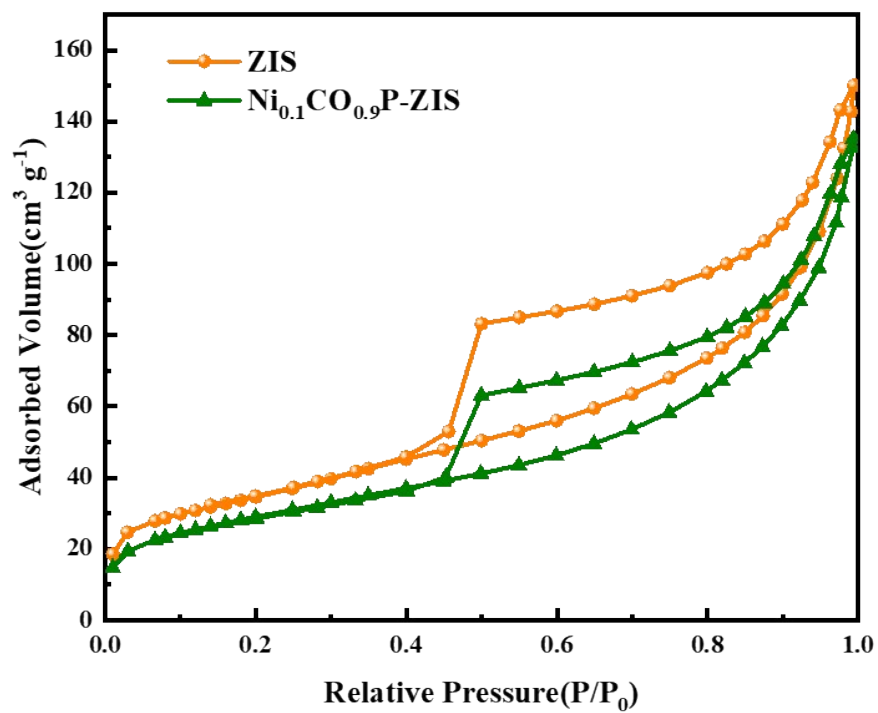

Fig. S3 Nitrogen adsorption-desorption isotherms of pure ZIS and Ni<sub>0.1</sub>Co<sub>0.9</sub>P-ZIS.

**Table S1** Summary of BET, pore volume of as-prepared pure ZIS and Ni<sub>0.1</sub>Co<sub>0.9</sub>P-ZIS.

|                                             | S <sub>BET</sub> (m <sup>2</sup> /g) | Pore volume(cm <sup>3</sup> /g) |
|---------------------------------------------|--------------------------------------|---------------------------------|
| Pure ZIS                                    | 123.8                                | 0.19                            |
| 2%Ni <sub>0.1</sub> Co <sub>0.9</sub> P-ZIS | 105.5                                | 0.17                            |

**Table S2** The specific charge transfer resistance( $R_{ct}$ ) of ZIS, Ni<sub>2</sub>P-ZIS, CoP-ZIS, Ni<sub>0.1</sub>Co<sub>0.9</sub>P-ZIS.

| Photocatalyst                                                           | $R_{ct}(k\Omega)$ |
|-------------------------------------------------------------------------|-------------------|
| <b>ZnIn<sub>2</sub>S<sub>4</sub></b>                                    | <b>57.57</b>      |
| <b>Ni<sub>2</sub>P-ZnIn<sub>2</sub>S<sub>4</sub></b>                    | <b>52.87</b>      |
| <b>CoP-ZnIn<sub>2</sub>S<sub>4</sub></b>                                | <b>47.44</b>      |
| <b>Ni<sub>0.1</sub>Co<sub>0.9</sub>P- ZnIn<sub>2</sub>S<sub>4</sub></b> | <b>18.12</b>      |

**Table S3** The performance comparison of different ZnIn<sub>2</sub>S<sub>4</sub> based Photocatalyst

| Photocatalyst                              | Photocatalytic H <sub>2</sub> evolution Rate             | Weight             | Cocatalyst | Sacrificial agent                                 | Reference |
|--------------------------------------------|----------------------------------------------------------|--------------------|------------|---------------------------------------------------|-----------|
| Ni <sub>0.1</sub> Co <sub>0.9</sub> P/ZIS  | 3839 $\mu\text{mol}\cdot\text{g}^{-1}\cdot\text{h}^{-1}$ | 300 W Xe (>420 nm) | /          | TEOA                                              | This work |
| Cu <sub>3</sub> P/ZIS                      | 2091.1 $\text{umol}\cdot\text{h}^{-1}\cdot\text{g}^{-1}$ | 300 W Xe (>420 nm) | /          | Na <sub>2</sub> S/Na <sub>2</sub> SO <sub>3</sub> | [1]       |
| Ni <sub>2</sub> P/ZIS                      | 2066 $\text{umol}\cdot\text{h}^{-1}\cdot\text{g}^{-1}$   | 300 W Xe (>420 nm) | /          | lactic acid                                       | [2]       |
| Ni <sub>12</sub> P <sub>5</sub> /ZIS       | 2263 $\text{umol}\cdot\text{h}^{-1}\cdot\text{g}^{-1}$   | 300 W Xe (>420 nm) | /          | Na <sub>2</sub> S/Na <sub>2</sub> SO <sub>3</sub> | [3]       |
| CoFe <sub>2</sub> O <sub>4</sub> /ZIS      | 800 $\text{umol}\cdot\text{h}^{-1}\cdot\text{g}^{-1}$    | 300 W Xe (>420 nm) | Pt         | TEOA                                              | [4]       |
| WO <sub>3</sub> /ZIS                       | 2202.9 $\text{umol}\cdot\text{h}^{-1}\cdot\text{g}^{-1}$ | 300 W Xe (>420 nm) | /          | Na <sub>2</sub> S/Na <sub>2</sub> SO <sub>3</sub> | [5]       |
| CeO <sub>2</sub> /ZIS                      | 847.42 $\text{umol}\cdot\text{h}^{-1}\cdot\text{g}^{-1}$ | 300 W Xe (>420 nm) | /          | Na <sub>2</sub> S/Na <sub>2</sub> SO <sub>3</sub> | [6]       |
| BP/ZnIn <sub>2</sub> S <sub>4</sub>        | 1278 $\text{umol}\cdot\text{h}^{-1}\cdot\text{g}^{-1}$   | 300 W Xe (>420 nm) | Pt         | Na <sub>2</sub> S/Na <sub>2</sub> SO <sub>3</sub> | [7]       |
| 2D/2D ZIS/MoS <sub>2</sub>                 | 4974 $\text{umol}\cdot\text{h}^{-1}\cdot\text{g}^{-1}$   | 300 W Xe (>400 nm) | /          | lactic acid                                       | [8]       |
| 2D/2D g-C <sub>3</sub> N <sub>4</sub> /ZIS | 2780 $\text{umol}\cdot\text{h}^{-1}\cdot\text{g}^{-1}$   | 300 W Xe (>420 nm) | /          | TEOA                                              | [9]       |
| CuInS <sub>2</sub> /ZIS                    | 1168 $\text{umol}\cdot\text{h}^{-1}\cdot\text{g}^{-1}$   | 300 W Xe (>420 nm) | /          | Na <sub>2</sub> S/Na <sub>2</sub> SO <sub>3</sub> | [10]      |
| In(OH) <sub>3</sub> /ZIS                   | 2088 $\text{umol}\cdot\text{h}^{-1}\cdot\text{g}^{-1}$   | 300 W Xe (>420 nm) | /          | Na <sub>2</sub> S/Na <sub>2</sub> SO <sub>3</sub> | [11]      |
| CdS/QDs/ZIS                                | 2107.5 $\text{umol}\cdot\text{h}^{-1}\cdot\text{g}^{-1}$ | 300 W Xe (>420 nm) | /          | lactic acid                                       | [12]      |
| ZnS/ZIS                                    | 453.4 $\text{umol}\cdot\text{h}^{-1}\cdot\text{g}^{-1}$  | 300 W Xe (AM 1.5)  | /          | TEOA                                              | [13]      |
| WS <sub>2</sub> /ZIS                       | 199.1 $\text{umol}\cdot\text{h}^{-1}\cdot\text{g}^{-1}$  | 300 W Xe (>420 nm) | /          | Na <sub>2</sub> S/Na <sub>2</sub> SO <sub>3</sub> | [14]      |
| AgO <sub>2</sub> /ZIS                      | 2334.1 $\text{umol}\cdot\text{h}^{-1}\cdot\text{g}^{-1}$ | 300 W Xe (>420 nm) | Pt         | TEOA                                              | [15]      |



## Reference

- 1 Z. Yang, L. Shao, L. Wang, X. Xia, Y. Liu, S. Cheng, C. Yang and S. Li, Boosted photogenerated carriers separation in Z-scheme  $\text{Cu}_3\text{P}/\text{ZnIn}_2\text{S}_4$  heterojunction photocatalyst for highly efficient  $\text{H}_2$  evolution under visible light, *Int. J. Hydrogen Energy*, 2020, **45**, 14334-14346.
- 2 X. L. Li, X. J. Wang, J. Y. Zhu, Y. P. Li, J. Zhao and F.T. Li, Fabrication of two-dimensional  $\text{Ni}_2\text{P}/\text{ZnIn}_2\text{S}_4$  heterostructures for enhanced photocatalytic hydrogen evolution, *Chem. Eng. J.*, 2018, **353**, 15-24.
- 3 D. Zeng, Z. Lu, X. Gao, B. Wu and W. J. Ong, Hierarchical flower-like  $\text{ZnIn}_2\text{S}_4$  anchored with well-dispersed  $\text{Ni}_{12}\text{P}_5$  nanoparticles for high-quantum-yield photocatalytic  $\text{H}_2$  evolution under visible light, *Catal. Sci. Technol.*, 2019, **9**, 4010-4016.
- 4 C. Li, H. Che, P. Huo, Y. Yan, C. Liu and H. Dong, Confinement of ultrasmall  $\text{CoFe}_2\text{O}_4$  nanoparticles in hierarchical  $\text{ZnIn}_2\text{S}_4$  microspheres with enhanced interfacial charge separation for photocatalytic  $\text{H}_2$  evolution, *J. Colloid Interface Sci.*, 2020, **581**, 764-773.
- 5 L. Ye and Z. Wen,  $\text{ZnIn}_2\text{S}_4$  nanosheets decorating  $\text{WO}_3$  nanorods core-shell hybrids for boosting visible-light photocatalysis hydrogen generation, *Int. J. Hydrogen Energy*, 2019, **44**, 3751-3759.
- 6 M. Zhang, J. Yao, M. Arif, B. Qiu, H. Yin, X. Liu and S.-m. Chen, 0D/2D  $\text{CeO}_2/\text{ZnIn}_2\text{S}_4$  Z-scheme heterojunction for visible-light-driven photocatalytic  $\text{H}_2$  evolution, *Appl. Surf. Sci.*, 2020, **526**, 145749.
- 7 Q. Zhang, J. Zhang, L. Zhang, M. Cao, F. Yang and W.-L. Dai, Facile construction of flower-like black phosphorus nanosheet@ $\text{ZnIn}_2\text{S}_4$  composite with highly efficient catalytic performance in hydrogen production, *Appl. Surf. Sci.*, 2020, **504**, 144366.
- 8 L. Huang, B. Han, X. Huang, S. Liang, Z. Deng, W. Chen, M. Peng and H. Deng, Ultrathin 2D/2D  $\text{ZnIn}_2\text{S}_4/\text{MoS}_2$  hybrids for boosted photocatalytic hydrogen evolution under visible light, *J. Alloys Compd.*, 2019, **798**, 553-559.
- 9 B. Lin, H. Li, H. An, W. Hao, J. Wei, Y. Dai, C. Ma and G. Yang, Preparation of 2D/2D g- $\text{C}_3\text{N}_4$  nanosheet@ $\text{ZnIn}_2\text{S}_4$  nanoleaf heterojunctions with well-designed high-speed charge transfer nanochannels towards high-efficiency photocatalytic hydrogen evolution, *Appl. Catal. B*, 2018, **220**, 542-552.
- 10 X. Guo, Y. Peng, G. Liu, G. Xie, Y. Guo, Y. Zhang and J. Yu, An Efficient  $\text{ZnIn}_2\text{S}_4@ \text{CuInS}_2$  Core-Shell p-n Heterojunction to Boost Visible-Light Photocatalytic Hydrogen Evolution, *J. Phys. Chem. C*, 2020, **124**, 5934-5943.
- 11 H. Zhao, T. Zhang, D. Shan, Y. Zhu, G. Gao, Y. Liu, J. Liu, M. Liu and W. You,  $\text{ZnIn}_2\text{S}_4/\text{In}(\text{OH})_3$  hollow microspheres fabricated by one-step l-cysteine-mediated hydrothermal growth for enhanced hydrogen production and MB degradation, *Int. J. Hydrogen Energy*, 2020, **45**, 13975-13984.
- 12 W. Chen, R.-Q. Yan, J.-Q. Zhu, G.-B. Huang and Z. Chen, Highly efficient visible-light-driven photocatalytic hydrogen evolution by all-solid-state Z-scheme  $\text{CdS}/\text{QDs}/\text{ZnIn}_2\text{S}_4$  architectures with  $\text{MoS}_2$  quantum dots as solid-state electron mediator, *Appl. Surf. Sci.*, 2020, **504**, 144406.
- 13 H. Song, N. Wang, H. Meng, Y. Han, J. Wu, J. Xu, Y. Xu, X. Zhang and T. Sun, A facile synthesis of a ZIF-derived  $\text{ZnS}/\text{ZnIn}_2\text{S}_4$  heterojunction and enhanced photocatalytic hydrogen evolution, *Dalton Trans.*, 2020, **49**, 10816-10823.
- 14 J. Zhou, D. Chen, L. Bai, L. Qin, X. Sun and Y. Huang, Decoration of  $\text{WS}_2$  as an effective noble-metal free cocatalyst on  $\text{ZnIn}_2\text{S}_4$  for enhanced visible light photocatalytic hydrogen evolution, *Int. J. Hydrogen Energy*, 2018, **43**, 18261-18269.
- 15 Y. Xiao, Z. Peng, W. Zhang, Y. Jiang and L. Ni, Self-assembly of  $\text{Ag}_2\text{O}$  quantum dots on the surface of  $\text{ZnIn}_2\text{S}_4$

nanosheets to fabricate pn heterojunctions with wonderful bifunctional photocatalytic performance, *Appl. Surf. Sci.*, 2019, **494**, 519-531.
